# Supplementary material for: Redox-responsive micellar nanoparticles using benzothiazole-disulfide terminated polymers: employing host–guest complexation for targeted delivery of curcumin
Source: Royal Society of Chemistry journal article supplement (doi:10.1039/d4py01086h), 2025-01-01
Supplement: d4py01086h1.pdf [file d4py01086h1.pdf]

## SUPPORTING INFORMATION

### Redox-Responsive Micellar Nanoparticles Using Benzothiazole-disulfide Terminated Polymers: Employing Host-Guest Complexation for Targeted Delivery of Curcumin

*Salli Kocak,<sup>a</sup> Beyza Demirkol,<sup>a</sup> Ruveyda Kilic Boz,<sup>a</sup> Rana Sanyal,<sup>\*a,b</sup>*

*Mehmet Arslan,<sup>\*c</sup> Amitav Sanyal<sup>\*a,b</sup>*

<sup>a</sup> Department of Chemistry, Bogazici University, Bebek, Istanbul, 34342, Türkiye

<sup>b</sup> Center for Life Sciences and Technologies, Bogazici University, Istanbul, Türkiye

<sup>c</sup> Department of Polymer Materials Engineering, Faculty of Engineering, Yalova University, Yalova 77200, Türkiye

#### List of Figures

Fig. S1 <sup>13</sup>C NMR spectrum of the BDS-bearing CTA.

Fig. S2 SEC traces of P1, P2, and P3 polymers.

Fig. S3 SEC traces of P1 and CD-PEG polymers.

Fig. S4 <sup>1</sup>H NMR spectrum of the polymer CD-PEG-COOH in CDCl<sub>3</sub>.

Fig. S5 SEC traces of CD-PEG, CD-PEG-COOH and CD-PEG-RGD polymers.

Fig. S6 The size distribution histograms of curcumin-loaded nanoparticles according to STEM image.

Fig. S7 UV spectra of curcumin released from nanoparticles in 5 mM GSH in Acetate buffer (pH 5.5) and in 5 mM GSH in PBS buffer (pH 7.4)

Fig. S8 (a) DLS analysis of curcumin-loaded nanoparticles in PBS; (b) after 4 hours, and (c) after 24 hours in GSH solution (0.010 M).

Fig. S9 (a) Flow cytometry data and (b) fluorescence microscopy images of U-87 MG cell line treated with curcumin encapsulated targeted nanoparticles for 4 hours at 4 °C and 37 °C. Scale bar: 20 μm.

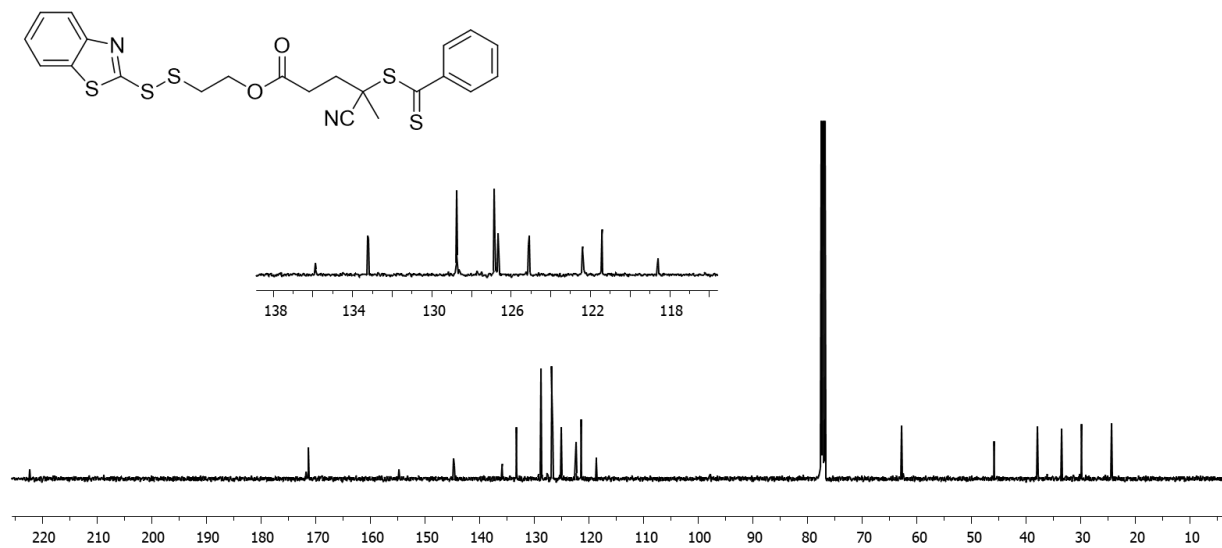

Fig. S1  $^{13}\text{C}$  NMR spectrum of the BDS-bearing CTA.

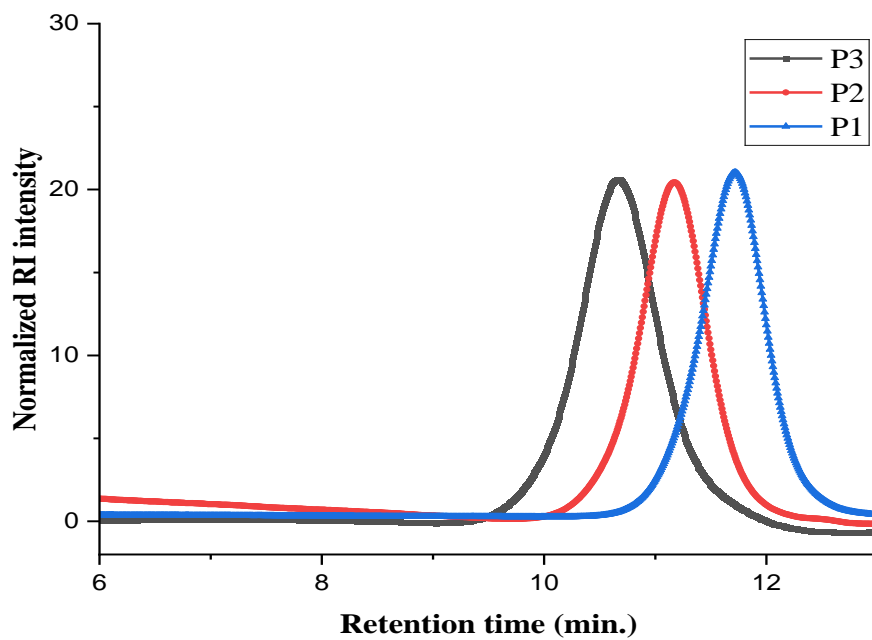

Fig. S2 SEC traces of P1, P2, and P3 polymers.

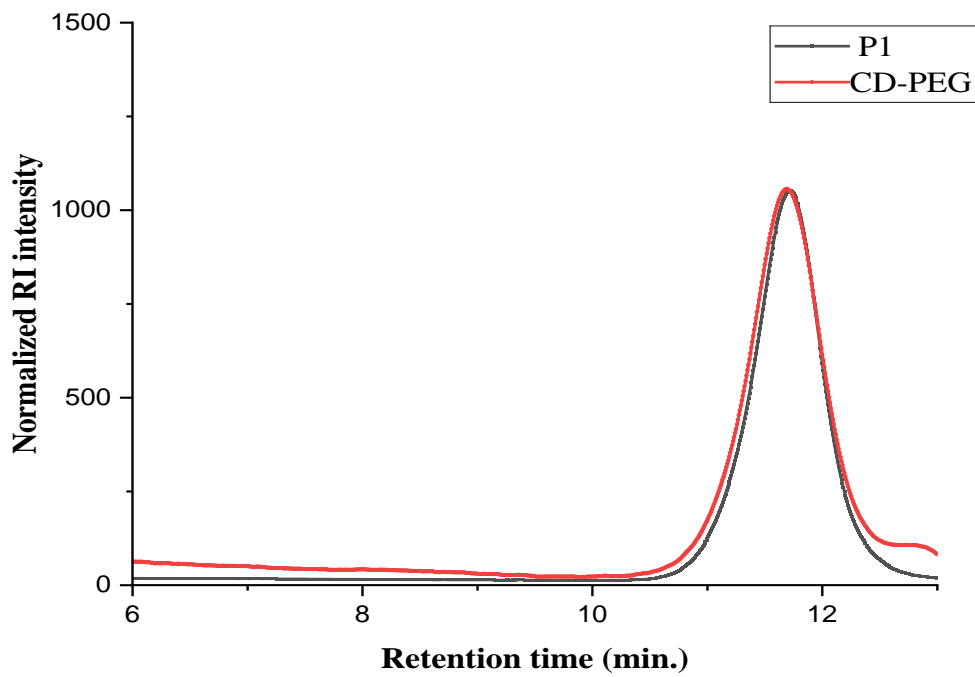

Fig. S3 SEC traces of P1 and CD-PEG polymers.

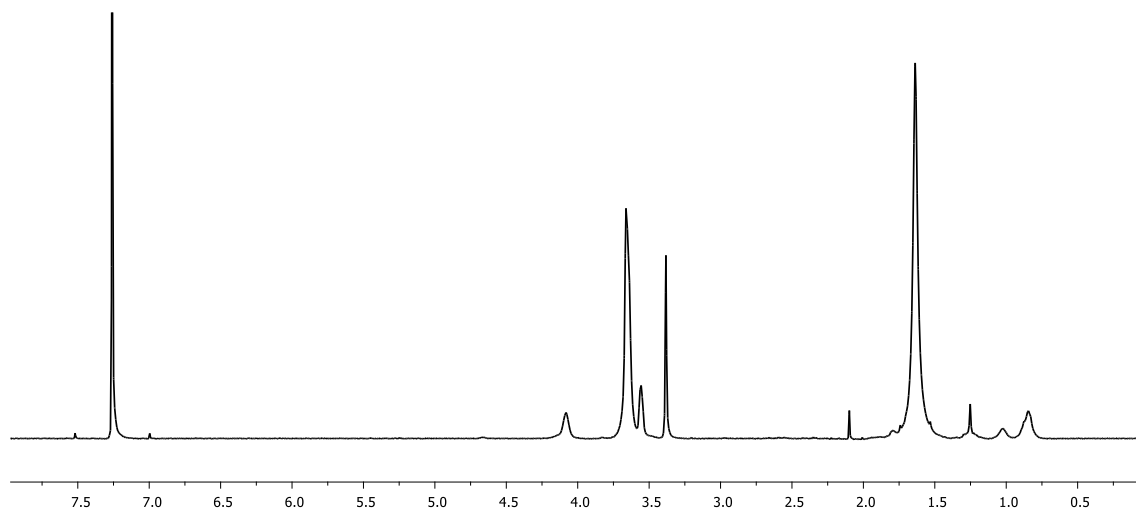

Fig. S4 <sup>1</sup>H NMR spectrum of the polymer CD-PEG-COOH in CDCl<sub>3</sub>.

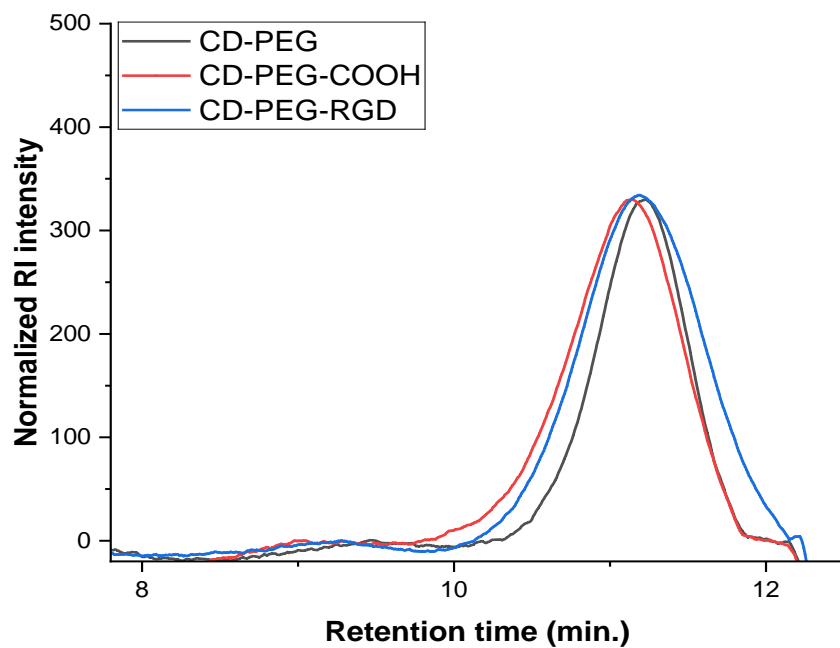

Fig. S5 SEC traces of CD-PEG, CD-PEG-COOH and CD-PEG-RGD polymers.

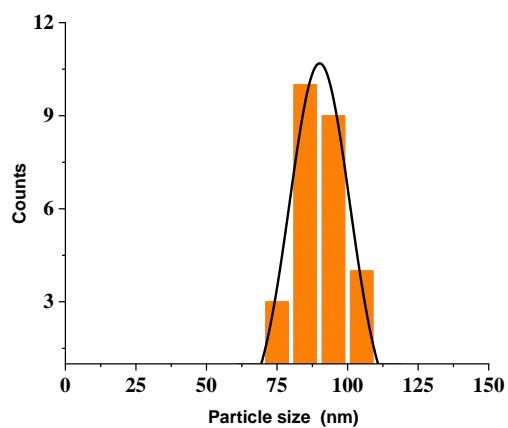

Fig. S6 The size distribution histograms of curcumin-loaded nanoparticles according to STEM image.

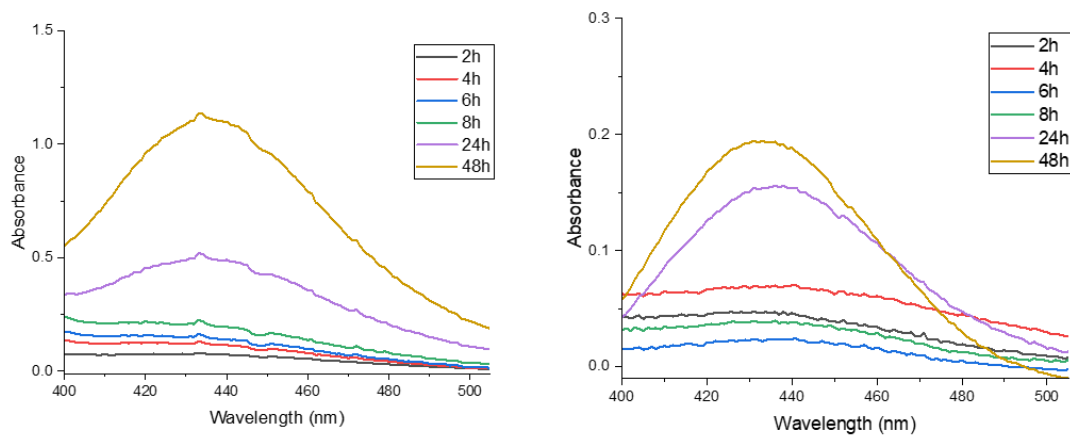

Fig. S7 UV spectra of curcumin released from nanoparticles in 5 mM GSH in Acetate buffer ( pH 5.5) and in 5 mM GSH in PBS buffer ( pH 7.4).

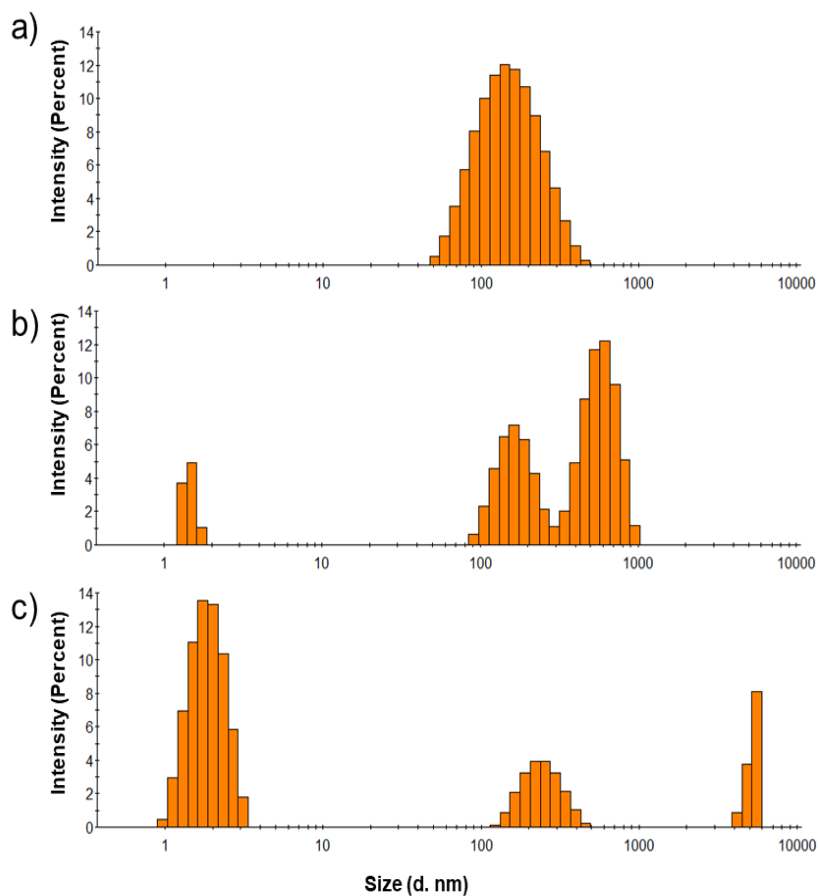

Fig. S8 (a) DLS analysis of curcumin-loaded nanoparticles in PBS; (b) after 4 hours, and (c) after 24 hours in GSH solution (0.010 M).

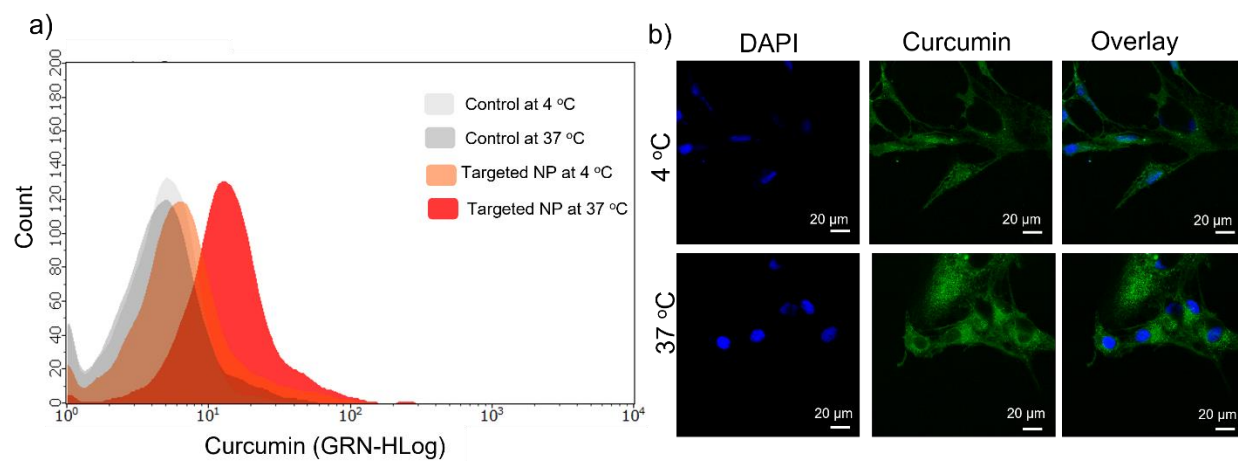

Fig. S9 (a) Flow cytometry data and (b) fluorescence microscopy images of U-87 MG cell line treated with curcumin encapsulated targeted nanoparticles for 4 hours at 4 °C and 37 °C.
